# Supplementary material for: Effects of Taurine on Primary Metabolism and Transcription in a Coral Symbiodinium sp
Source: Front Microbiol. 2022 Jul 11;13:797688. doi: 10.3389/fmicb.2022.797688 (PMC9309572; doi:10.3389/fmicb.2022.797688)
Supplement: Supplementary file 17 [file Table_8.xlsx]

## Sheet: Table S8
Table S8. Statics of upregulated genges.
seq_id	length	Control_vs_Taurine_fc(Taurine/Control)	Control_vs_Taurine_log2fc(Taurine/Control)	Control_vs_Taurine_pvalue	Control_vs_Taurine_padjust	Control_vs_Taurine_significant	Control_vs_Taurine_regulate	nr	go	KO_id	KO_name	paths	cog	cog_description	pfam	swissprot
TRINITY_DN25247_c0_g1	238	25.3787	4.66555	0.00696038	0.998325	yes	up
TRINITY_DN45507_c0_g1	239	22.0288	4.46132	0.0116214	0.998325	yes	up
TRINITY_DN5998_c1_g1	355	19.9223	4.31631	0.0154962	0.998325	yes	up	OLP77274.1(hypothetical protein AK812_SmicGene42682, partial [Symbiodinium microadriaticum])	GO:0031418(molecular_function:L-ascorbic acid binding); GO:0016705(molecular_function:oxidoreductase activity, acting on paired donors, with incorporation or reduction of molecular oxygen); GO:0008017(molecular_function:microtubule binding); GO:0051537(molecular_function:2 iron, 2 sulfur cluster binding); GO:0007018(biological_process:microtubule-based movement); GO:0003824(molecular_function:cat…
TRINITY_DN30859_c0_g1	306	19.8417	4.31046	0.0188948	0.998325	yes	up
TRINITY_DN28724_c0_g2	311	18.1757	4.18394	0.0228296	0.998325	yes	up
TRINITY_DN8824_c0_g3	346	17.9801	4.16833	0.0335686	0.998325	yes	up
TRINITY_DN20378_c0_g2	452	17.9041	4.16222	0.0129895	0.998325	yes	up	XP_021947075.1(tubulin alpha-1 chain [Folsomia candida])	GO:0005737(cellular_component:cytoplasm); GO:0007017(biological_process:microtubule-based process); GO:0003924(molecular_function:GTPase activity); GO:0005200(molecular_function:structural constituent of cytoskeleton); GO:0005874(cellular_component:microtubule); GO:0005525(molecular_function:GTP binding)	K07374	TUBA	map04540(Gap junction); map05010(Alzheimer's disease); map05016(Huntington's disease); map05130(Pathogenic Escherichia coli infection); map04530(Tight junction); map04210(Apoptosis); map04145(Phagosome)	COG5023(Z:Cytoskeleton)	COG5023(protein polymerization)	PF03953(Tubulin_C:Tubulin C-terminal domain)	sp|P06603|TBA1_DROME(Tubulin alpha-1 chain OS=Drosophila melanogaster OX=7227 GN=alphaTub84B PE=1 SV=1)
TRINITY_DN39898_c0_g1	206	17.7643	4.15091	0.0303808	0.998325	yes	up
TRINITY_DN27302_c0_g1	292	17.6473	4.14137	0.026632	0.998325	yes	up	OLP82017.1(Mitogen-activated protein kinase kinase kinase 2 [Symbiodinium microadriaticum])	GO:0006633(biological_process:fatty acid biosynthetic process); GO:0009317(cellular_component:acetyl-CoA carboxylase complex); GO:0090729(molecular_function:toxin activity); GO:0004672(molecular_function:protein kinase activity); GO:0003989(molecular_function:acetyl-CoA carboxylase activity); GO:0016021(cellular_component:integral component of membrane); GO:0005524(molecular_function:ATP binding)	K04382	PPP2C	map04136(Autophagy - other); map04111(Cell cycle - yeast); map05142(Chagas disease (American trypanosomiasis)); map04113(Meiosis - yeast); map04114(Oocyte meiosis); map05160(Hepatitis C); map04390(Hippo signaling pathway); map04391(Hippo signaling pathway - fly); map04350(TGF-beta signaling pathway); map04261(Adrenergic signaling in cardiomyocytes); map04138(Autophagy - yeast); map04151(PI3K-Akt …
TRINITY_DN26589_c0_g1	315	16.0567	4.0051	0.0484366	0.998325	yes	up
TRINITY_DN20116_c1_g1	558	15.9704	3.99733	0.000119328	0.181621	yes	up	SOX55400.1(hypothetical protein MAAFP003_4092, partial [Mycobacterium ahvazicum])					ENOG410Y13W(S:Function unknown)	ENOG410Y13W(PG1 protein, homology to Homo sapiens)
TRINITY_DN54129_c0_g1	324	15.9613	3.99651	0.0344535	0.998325	yes	up
TRINITY_DN37381_c0_g1	239	15.7428	3.97662	0.038713	0.998325	yes	up
TRINITY_DN3170_c0_g2	331	15.5706	3.96075	0.0139356	0.998325	yes	up
TRINITY_DN19995_c0_g1	443	15.3002	3.93548	0.012113	0.998325	yes	up
TRINITY_DN9558_c0_g1	305	14.2908	3.83701	0.0154799	0.998325	yes	up	OLP97283.1(hypothetical protein AK812_SmicGene20405 [Symbiodinium microadriaticum])	GO:0016021(cellular_component:integral component of membrane); GO:0046872(molecular_function:metal ion binding); GO:0005524(molecular_function:ATP binding); GO:0003676(molecular_function:nucleic acid binding)
TRINITY_DN25412_c0_g1	304	14.2363	3.8315	0.0162378	0.998325	yes	up
TRINITY_DN16031_c0_g1	431	14.0451	3.81199	0.0207087	0.998325	yes	up	OLQ11947.1(hypothetical protein AK812_SmicGene4208 [Symbiodinium microadriaticum])	GO:0003964(molecular_function:RNA-directed DNA polymerase activity); GO:0016021(cellular_component:integral component of membrane); GO:0004523(molecular_function:RNA-DNA hybrid ribonuclease activity); GO:0003676(molecular_function:nucleic acid binding)
TRINITY_DN21606_c0_g1	420	12.0763	3.59411	0.0323721	0.998325	yes	up
TRINITY_DN28100_c0_g4	814	11.7862	3.55902	0.0133923	0.998325	yes	up	XP_030750309.1(myosin regulatory light chain 2-like [Sitophilus oryzae])	GO:0005509(molecular_function:calcium ion binding)				COG5126(T:Signal transduction mechanisms)	COG5126(NIMA-related kinase)	PF13405(EF-hand_6:EF-hand domain); PF00036(EF-hand_1:EF hand); PF13499(EF-hand_7:EF-hand domain pair); PF13833(EF-hand_8:EF-hand domain pair); PF13202(EF-hand_5:EF hand)	sp|Q1HPS0|MLR_BOMMO(Myosin regulatory light chain 2 OS=Bombyx mori OX=7091 PE=1 SV=1)
TRINITY_DN26571_c0_g1	437	11.5585	3.53088	0.0161383	0.998325	yes	up	XP_019768126.1(PREDICTED: uncharacterized protein LOC109543047 [Dendroctonus ponderosae])	GO:0005576(cellular_component:extracellular region); GO:0008289(molecular_function:lipid binding); GO:0006869(biological_process:lipid transport)				ENOG410ZBCR(S:Function unknown)	ENOG410ZBCR(-)	PF07464(ApoLp-III:Apolipophorin-III precursor (apoLp-III)); PF01442(Apolipoprotein:Apolipoprotein A1/A4/E domain); PF07083(DUF1351:Protein of unknown function (DUF1351))
TRINITY_DN11637_c0_g1	1393	11.361	3.50602	0.0160045	0.998325	yes	up	XP_018577421.1(actin, muscle [Anoplophora glabripennis])	GO:0005737(cellular_component:cytoplasm); GO:0005856(cellular_component:cytoskeleton); GO:0005524(molecular_function:ATP binding)	K05692	ACTB_G1	map05164(Influenza A); map04390(Hippo signaling pathway); map04391(Hippo signaling pathway - fly); map04015(Rap1 signaling pathway); map04210(Apoptosis); map04810(Regulation of actin cytoskeleton); map04921(Oxytocin signaling pathway); map05131(Shigellosis); map05130(Pathogenic Escherichia coli infection); map05132(Salmonella infection); map04145(Phagosome); map04745(Phototransduction - fly); map…	COG5277(Z:Cytoskeleton)	COG5277(Actin-related protein)	PF00022(Actin:Actin)	sp|P49871|ACT_MANSE(Actin, muscle OS=Manduca sexta OX=7130 PE=2 SV=1)
TRINITY_DN50792_c0_g1	403	11.1866	3.4837	0.0200291	0.998325	yes	up	WP_115555122.1(phasin family protein [Xanthomonas arboricola])							PF09361(Phasin_2:Phasin protein)
TRINITY_DN7851_c0_g2	477	11.1258	3.47583	0.0458353	0.998325	yes	up
TRINITY_DN24317_c0_g1	487	10.2133	3.35238	0.0490081	0.998325	yes	up
TRINITY_DN35304_c0_g1	239	9.79234	3.29165	0.0339739	0.998325	yes	up	EFF43320.1(hypothetical protein XAUB_25800 [Xanthomonas citri pv. aurantifolii str. ICPB 11122])	GO:0003735(molecular_function:structural constituent of ribosome); GO:0006412(biological_process:translation); GO:0005840(cellular_component:ribosome)	K02970	RP-S21, MRPS21, rpsU	map03010(Ribosome)	COG0828(J:Translation, ribosomal structure and biogenesis)	COG0828(30S ribosomal protein S21)		sp|B4SHI8|RS21_STRM5(30S ribosomal protein S21 OS=Stenotrophomonas maltophilia (strain R551-3) OX=391008 GN=rpsU PE=3 SV=1)
TRINITY_DN25413_c0_g1	688	9.39406	3.23175	0.000601319	0.451167	yes	up	XP_030746618.1(muscle-specific protein 20 [Sitophilus oryzae])		K20526	TAGLN		COG5199(S:Function unknown)	COG5199(Kelch domain containing)	PF00307(CH:Calponin homology (CH) domain); PF00402(Calponin:Calponin family repeat)	sp|P14318|MP20_DROME(Muscle-specific protein 20 OS=Drosophila melanogaster OX=7227 GN=Mp20 PE=2 SV=2)
TRINITY_DN17124_c0_g1	520	8.14073	3.02516	0.0351924	0.998325	yes	up
TRINITY_DN25655_c0_g2	477	8.04817	3.00866	0.00175632	0.688488	yes	up	XP_023014277.1(muscle LIM protein 1-like isoform X4 [Leptinotarsa decemlineata])	GO:0046872(molecular_function:metal ion binding)				ENOG410Z840(S:Function unknown); ENOG410ZTJU(S:Function unknown); COG5069(Z:Cytoskeleton)	ENOG410Z840(Cysteine and glycine-rich protein 3 (Cardiac LIM protein)); ENOG410ZTJU(LIM domain); COG5069(Microtubule associated monoxygenase, calponin and LIM domain containing)	PF00412(LIM:LIM domain)	sp|P53777|MLP1_DROME(Muscle LIM protein 1 OS=Drosophila melanogaster OX=7227 GN=Mlp60A PE=2 SV=1)
TRINITY_DN21242_c0_g1	665	7.83916	2.9707	0.0142035	0.998325	yes	up	OLP94491.1(putative peptidase C1-like protein [Symbiodinium microadriaticum])	GO:0020037(molecular_function:heme binding); GO:0035091(molecular_function:phosphatidylinositol binding); GO:0004519(molecular_function:endonuclease activity); GO:0016021(cellular_component:integral component of membrane); GO:0008234(molecular_function:cysteine-type peptidase activity); GO:0019239(molecular_function:deaminase activity); GO:0004190(molecular_function:aspartic-type endopeptidase ac…
TRINITY_DN8358_c0_g5	276	7.82925	2.96887	0.0416969	0.998325	yes	up	OLQ02264.1(hypothetical protein AK812_SmicGene14926 [Symbiodinium microadriaticum])							PF13540(RCC1_2:Regulator of chromosome condensation (RCC1) repeat)
TRINITY_DN29903_c0_g1	348	7.79013	2.96165	0.0403743	0.998325	yes	up
TRINITY_DN44840_c0_g1	637	6.84128	2.77427	0.000994125	0.551646	yes	up	YP_009128661.1(cytochrome c oxidase subunit II [Eucryptorrhynchus scrobiculatus])	GO:0004129(molecular_function:cytochrome-c oxidase activity); GO:0005743(cellular_component:mitochondrial inner membrane); GO:0016021(cellular_component:integral component of membrane); GO:0005507(molecular_function:copper ion binding); GO:0070469(cellular_component:respiratory chain)	K02261	COX2	map00190(Oxidative phosphorylation); map04260(Cardiac muscle contraction); map05012(Parkinson's disease); map05010(Alzheimer's disease); map05016(Huntington's disease); map04932(Non-alcoholic fatty liver disease (NAFLD))	COG1622(O:Posttranslational modification, protein turnover, chaperones)	COG1622(cop9 signalosome complex subunit)	PF00116(COX2:Cytochrome C oxidase subunit II, periplasmic domain); PF02790(COX2_TM:Cytochrome C oxidase subunit II, transmembrane domain)	sp|P29879|COX2_SITGR(Cytochrome c oxidase subunit 2 OS=Sitophilus granarius OX=7046 GN=COII PE=3 SV=1)
TRINITY_DN4839_c0_g1	483	6.80077	2.7657	0.0135961	0.998325	yes	up
TRINITY_DN54515_c0_g1	415	6.71255	2.74686	0.0212084	0.998325	yes	up	AKK25135.1(odorant binding protein 9, partial [Dendroctonus ponderosae])	GO:0005549(molecular_function:odorant binding)				ENOG410ZCHW(S:Function unknown)	ENOG410ZCHW(Odorant-binding protein)	PF01395(PBP_GOBP:PBP/GOBP family)
TRINITY_DN28368_c0_g1	457	6.16457	2.624	0.0339195	0.998325	yes	up	AVI04883.1(putative odorant-binding protein 2 [Anthonomus grandis])	GO:0005549(molecular_function:odorant binding)				ENOG410Z2AJ(S:Function unknown)	ENOG410Z2AJ(-)	PF01395(PBP_GOBP:PBP/GOBP family)
TRINITY_DN29171_c0_g1	330	5.93081	2.56823	0.0425746	0.998325	yes	up	WP_133256653.1(60S ribosomal protein L28, partial [Enterobacter hormaechei])	GO:0003735(molecular_function:structural constituent of ribosome); GO:0043009(biological_process:chordate embryonic development); GO:0022625(cellular_component:cytosolic large ribosomal subunit); GO:0006412(biological_process:translation); GO:0005840(cellular_component:ribosome)	K02903	RP-L28e, RPL28	map03010(Ribosome)	ENOG4111T32(S:Function unknown)	ENOG4111T32(Conserved hypothetical, protein)	PF01778(Ribosomal_L28e:Ribosomal L28e protein family)	sp|Q3T0L7|RL28_BOVIN(60S ribosomal protein L28 OS=Bos taurus OX=9913 GN=RPL28 PE=2 SV=3)
TRINITY_DN24346_c0_g2	1490	5.85523	2.54973	0.0144031	0.998325	yes	up	AJZ71904.1(cytochrome c oxidase subunit I [Eucryptorrhynchus scrobiculatus])	GO:0004129(molecular_function:cytochrome-c oxidase activity); GO:0045277(cellular_component:respiratory chain complex IV); GO:0020037(molecular_function:heme binding); GO:0016021(cellular_component:integral component of membrane); GO:0005743(cellular_component:mitochondrial inner membrane); GO:0009060(biological_process:aerobic respiration); GO:0046872(molecular_function:metal ion binding); GO:00…	K02256	COX1	map00190(Oxidative phosphorylation); map04260(Cardiac muscle contraction); map05012(Parkinson's disease); map05010(Alzheimer's disease); map05016(Huntington's disease); map04932(Non-alcoholic fatty liver disease (NAFLD))	COG0843(C:Energy production and conversion)	COG0843(Cytochrome C oxidase subunit I)	PF00115(COX1:Cytochrome C and Quinol oxidase polypeptide I)	sp|Q34391|COX1_DROSE(Cytochrome c oxidase subunit 1 OS=Drosophila sechellia OX=7238 GN=mt:CoI PE=3 SV=2)
TRINITY_DN45786_c0_g1	686	5.78137	2.53141	0.0436289	0.998325	yes	up
TRINITY_DN12587_c0_g1	613	5.18153	2.37338	0.0330883	0.998325	yes	up
TRINITY_DN51001_c0_g1	307	4.95758	2.30964	0.0140662	0.998325	yes	up
TRINITY_DN12498_c0_g1	670	4.87902	2.28659	0.0298281	0.998325	yes	up
TRINITY_DN23599_c0_g1	1003	4.23274	2.08159	0.016788	0.998325	yes	up	KPQ18544.1(imidazolonepropionase HutI [Rhodobacteraceae bacterium HLUCCO18])	GO:0005737(cellular_component:cytoplasm); GO:0050480(molecular_function:imidazolonepropionase activity); GO:0019556(biological_process:histidine catabolic process to glutamate and formamide); GO:0019557(biological_process:histidine catabolic process to glutamate and formate); GO:0005506(molecular_function:iron ion binding); GO:0008270(molecular_function:zinc ion binding)	K01468	hutI, AMDHD1	map00340(Histidine metabolism)	COG1228(S:Function unknown)	COG1228(RNA binding motif protein 19)	PF07969(Amidohydro_3:Amidohydrolase family); PF01979(Amidohydro_1:Amidohydrolase family)	sp|Q162E3|HUTI_ROSDO(Imidazolonepropionase OS=Roseobacter denitrificans (strain ATCC 33942 / OCh 114) OX=375451 GN=hutI PE=3 SV=1)
TRINITY_DN40399_c0_g1	360	4.06155	2.02203	0.0370375	0.998325	yes	up
TRINITY_DN13007_c0_g1	306	4.02075	2.00746	0.0396046	0.998325	yes	up	OLP84421.1(hypothetical protein AK812_SmicGene34695 [Symbiodinium microadriaticum])	GO:0016021(cellular_component:integral component of membrane); GO:0046872(molecular_function:metal ion binding)
TRINITY_DN11858_c0_g1	660	4.01838	2.00661	0.0090265	0.998325	yes	up	CAJ30045.1(conserved hypothetical protein [Magnetospirillum gryphiswaldense MSR-1])					ENOG410XYMV(S:Function unknown)	ENOG410XYMV(-)
TRINITY_DN23770_c0_g2	549	3.90679	1.96598	0.030672	0.998325	yes	up	NP_001134280.1(esterase OVCA2 [Salmo salar])	GO:0005737(cellular_component:cytoplasm); GO:0017183(biological_process:peptidyl-diphthamide biosynthetic process from peptidyl-histidine); GO:0032526(biological_process:response to retinoic acid); GO:0005634(cellular_component:nucleus)				ENOG4111JYH(O:Posttranslational modification, protein turnover, chaperones)	ENOG4111JYH(peptidyl-prolyl cis-trans isomerase)	PF03959(FSH1:Serine hydrolase (FSH1))	sp|Q503Y4|OVCA2_DANRE(Esterase OVCA2 OS=Danio rerio OX=7955 GN=ovca2 PE=2 SV=1)
TRINITY_DN31067_c0_g1	387	3.81183	1.93048	0.035443	0.998325	yes	up
TRINITY_DN45102_c0_g1	733	3.68005	1.87972	0.0441177	0.998325	yes	up	OLQ08009.1(hypothetical protein AK812_SmicGene8492 [Symbiodinium microadriaticum])	GO:0016021(cellular_component:integral component of membrane)
TRINITY_DN41150_c0_g1	741	3.63702	1.86276	0.038082	0.998325	yes	up	ATU47282.1(hypothetical protein, partial [Rhynchophorus ferrugineus])	GO:0008199(molecular_function:ferric iron binding); GO:0006879(biological_process:cellular iron ion homeostasis); GO:0005623(cellular_component:cell); GO:0006826(biological_process:iron ion transport); GO:0004322(molecular_function:ferroxidase activity)				ENOG4111Q26(P:Inorganic ion transport and metabolism)	ENOG4111Q26(ferritin)
TRINITY_DN40915_c0_g1	732	3.45751	1.78973	0.0425452	0.998325	yes	up
TRINITY_DN8326_c0_g1	375	3.3924	1.76231	0.00832632	0.998325	yes	up	OLQ01281.1(hypothetical protein AK812_SmicGene15985 [Symbiodinium microadriaticum])							PF13540(RCC1_2:Regulator of chromosome condensation (RCC1) repeat)
TRINITY_DN25761_c0_g2	347	3.38466	1.75901	0.0235473	0.998325	yes	up	OLP94270.1(High affinity nitrate transporter 2.5 [Symbiodinium microadriaticum])	GO:0016787(molecular_function:hydrolase activity); GO:0004478(molecular_function:methionine adenosyltransferase activity); GO:0020037(molecular_function:heme binding); GO:0006556(biological_process:S-adenosylmethionine biosynthetic process); GO:0016021(cellular_component:integral component of membrane); GO:0030151(molecular_function:molybdenum ion binding); GO:0022857(molecular_function:transmemb…	K02575	NRT, narK, nrtP, nasA	map00910(Nitrogen metabolism)	COG2223(P:Inorganic ion transport and metabolism)	COG2223(Transporter)		sp|Q9LPV5|NRT25_ARATH(High affinity nitrate transporter 2.5 OS=Arabidopsis thaliana OX=3702 GN=NRT2.5 PE=1 SV=1)
TRINITY_DN40900_c0_g1	715	3.1539	1.65714	0.00961753	0.998325	yes	up
TRINITY_DN3181_c0_g4	764	3.07043	1.61844	0.000112545	0.180875	yes	up	SUX89036.1(Cell wall-associated hydrolase [Chromobacterium violaceum])					ENOG4111P6Q(S:Function unknown)	ENOG4111P6Q(-)		sp|Q3BAI2|YCX91_PHAAO(Uncharacterized protein ORF91 OS=Phalaenopsis aphrodite subsp. formosana OX=308872 PE=4 SV=1)
TRINITY_DN53971_c0_g1	733	3.03671	1.60251	0.0322032	0.998325	yes	up	OLP85191.1(2-oxoglutarate dehydrogenase, mitochondrial [Symbiodinium microadriaticum])	GO:0004591(molecular_function:oxoglutarate dehydrogenase (succinyl-transferring) activity); GO:0006099(biological_process:tricarboxylic acid cycle); GO:0008171(molecular_function:O-methyltransferase activity); GO:0030976(molecular_function:thiamine pyrophosphate binding)
TRINITY_DN27006_c0_g2	767	3.03621	1.60227	0.00908413	0.998325	yes	up
TRINITY_DN19699_c2_g1	436	2.90016	1.53613	0.0352069	0.998325	yes	up	OLP91981.1(putative E3 ubiquitin-protein ligase HERC1 [Symbiodinium microadriaticum])							PF13540(RCC1_2:Regulator of chromosome condensation (RCC1) repeat)
TRINITY_DN20023_c0_g2	715	2.87745	1.52479	0.0390717	0.998325	yes	up	OLP91014.1(hypothetical protein AK812_SmicGene27349 [Symbiodinium microadriaticum])	GO:0004363(molecular_function:glutathione synthase activity); GO:0020037(molecular_function:heme binding); GO:0008241(molecular_function:peptidyl-dipeptidase activity); GO:0016021(cellular_component:integral component of membrane); GO:0016539(biological_process:intein-mediated protein splicing); GO:0005524(molecular_function:ATP binding); GO:0022904(biological_process:respiratory electron transpo…
TRINITY_DN45220_c0_g1	207	2.84171	1.50676	0.0302972	0.998325	yes	up
TRINITY_DN12373_c0_g1	555	2.83031	1.50096	0.0281645	0.998325	yes	up	OLP93092.1(ATP-dependent zinc metalloprotease FTSH 10, mitochondrial [Symbiodinium microadriaticum])	GO:0016020(cellular_component:membrane); GO:0004222(molecular_function:metalloendopeptidase activity); GO:0005524(molecular_function:ATP binding)
TRINITY_DN14038_c0_g3	1272	2.79548	1.4831	0.0294854	0.998325	yes	up	OLQ07156.1(GTPase IMAP family member 6 [Symbiodinium microadriaticum])	GO:0016539(biological_process:intein-mediated protein splicing); GO:0016540(biological_process:protein autoprocessing); GO:0016787(molecular_function:hydrolase activity); GO:0005525(molecular_function:GTP binding)				ENOG4111GYZ(S:Function unknown); ENOG410Y0H9(S:Function unknown)	ENOG4111GYZ(Hydrolase); ENOG410Y0H9(gTPase, IMAP family member)	PF04548(AIG1:AIG1 family); PF01926(MMR_HSR1:50S ribosome-binding GTPase); PF03193(RsgA_GTPase:RsgA GTPase)	sp|Q8K349|GIMA6_MOUSE(GTPase IMAP family member 6 OS=Mus musculus OX=10090 GN=Gimap6 PE=2 SV=1)
TRINITY_DN37325_c0_g1	400	2.78994	1.48023	0.0396723	0.998325	yes	up
TRINITY_DN7048_c0_g2	646	2.72552	1.44653	0.0314715	0.998325	yes	up	OLP97849.1(hypothetical protein AK812_SmicGene19748 [Symbiodinium microadriaticum])
TRINITY_DN33593_c0_g1	753	2.68158	1.42308	0.0169512	0.998325	yes	up	OLQ07150.1(U4/U6 small nuclear ribonucleoprotein Prp31 [Symbiodinium microadriaticum])	GO:0046540(cellular_component:U4/U6 x U5 tri-snRNP complex); GO:0016021(cellular_component:integral component of membrane); GO:0000244(biological_process:spliceosomal tri-snRNP complex assembly)
TRINITY_DN45174_c0_g1	487	2.68045	1.42247	0.0445051	0.998325	yes	up
TRINITY_DN25041_c0_g2	614	2.62458	1.39209	0.0362228	0.998325	yes	up
TRINITY_DN47290_c0_g1	1772	2.60624	1.38197	0.00211139	0.739973	yes	up	OLP83719.1(Phosphoserine phosphatase, chloroplastic [Symbiodinium microadriaticum])	GO:0016021(cellular_component:integral component of membrane); GO:0006564(biological_process:L-serine biosynthetic process); GO:0004647(molecular_function:phosphoserine phosphatase activity)				COG0463(S:Function unknown)	COG0463(-)	PF00535(Glycos_transf_2:Glycosyl transferase family 2)
TRINITY_DN25646_c0_g1	964	2.5724	1.36312	0.0352346	0.998325	yes	up	OLQ13535.1(Pentatricopeptide repeat-containing protein, chloroplastic [Symbiodinium microadriaticum])	GO:0008080(molecular_function:N-acetyltransferase activity)
TRINITY_DN54483_c0_g1	1060	2.48483	1.31315	0.00965966	0.998325	yes	up	OLQ06379.1(Ankyrin repeat domain-containing protein 50 [Symbiodinium microadriaticum])	GO:0006629(biological_process:lipid metabolic process); GO:0016021(cellular_component:integral component of membrane); GO:0016301(molecular_function:kinase activity); GO:0006614(biological_process:SRP-dependent cotranslational protein targeting to membrane); GO:0003779(molecular_function:actin binding); GO:0005509(molecular_function:calcium ion binding); GO:0004672(molecular_function:protein kina…						PF12796(Ank_2:Ankyrin repeats (3 copies)); PF00023(Ank:Ankyrin repeat); PF13637(Ank_4:Ankyrin repeats (many copies)); PF13606(Ank_3:Ankyrin repeat); PF13857(Ank_5:Ankyrin repeats (many copies))
TRINITY_DN44360_c0_g1	681	2.48295	1.31206	0.0198513	0.998325	yes	up
TRINITY_DN11414_c0_g1	566	2.47866	1.30956	0.0047671	0.98698	yes	up	OLQ07371.1(hypothetical protein AK812_SmicGene9240 [Symbiodinium microadriaticum])	GO:0046872(molecular_function:metal ion binding)
TRINITY_DN6699_c0_g2	989	2.47838	1.3094	0.0274586	0.998325	yes	up	OLP77998.1(Caltractin ICL1f [Symbiodinium microadriaticum])	GO:0005509(molecular_function:calcium ion binding)
TRINITY_DN16133_c0_g1	572	2.4434	1.28889	0.0274396	0.998325	yes	up	OLQ12966.1(hypothetical protein AK812_SmicGene3042 [Symbiodinium microadriaticum])	GO:0031418(molecular_function:L-ascorbic acid binding); GO:0016705(molecular_function:oxidoreductase activity, acting on paired donors, with incorporation or reduction of molecular oxygen); GO:0008033(biological_process:tRNA processing); GO:0006486(biological_process:protein glycosylation); GO:0005096(molecular_function:GTPase activator activity); GO:0008017(molecular_function:microtubule binding…
TRINITY_DN11116_c0_g1	520	2.4233	1.27697	0.0332533	0.998325	yes	up
TRINITY_DN8370_c0_g1	1566	2.42328	1.27696	0.000671106	0.46411	yes	up	OLP78599.1(hypothetical protein AK812_SmicGene41213 [Symbiodinium microadriaticum])
TRINITY_DN25653_c0_g1	1173	2.41717	1.27332	0.0215355	0.998325	yes	up	OLQ00079.1(hypothetical protein AK812_SmicGene17297 [Symbiodinium microadriaticum])	GO:0005261(molecular_function:cation channel activity); GO:0016021(cellular_component:integral component of membrane); GO:0005886(cellular_component:plasma membrane); GO:0009982(molecular_function:pseudouridine synthase activity); GO:0008270(molecular_function:zinc ion binding); GO:0003723(molecular_function:RNA binding); GO:0008168(molecular_function:methyltransferase activity); GO:0032259(biolo…				COG0564(J:Translation, ribosomal structure and biogenesis)	COG0564(pseudouridine synthase activity)	PF00849(PseudoU_synth_2:RNA pseudouridylate synthase)	sp|Q82WZ5|RLUD_NITEU(Ribosomal large subunit pseudouridine synthase D OS=Nitrosomonas europaea (strain ATCC 19718 / CIP 103999 / KCTC 2705 / NBRC 14298) OX=228410 GN=rluD PE=3 SV=1)
TRINITY_DN3057_c0_g4	481	2.40612	1.26671	0.0244692	0.998325	yes	up	OLP93441.1(hypothetical protein AK812_SmicGene24657 [Symbiodinium microadriaticum])	GO:0016021(cellular_component:integral component of membrane); GO:0003824(molecular_function:catalytic activity); GO:0003677(molecular_function:DNA binding); GO:0008168(molecular_function:methyltransferase activity); GO:0032259(biological_process:methylation); GO:0016491(molecular_function:oxidoreductase activity)
TRINITY_DN21042_c0_g1	810	2.32989	1.22026	0.0248111	0.998325	yes	up	OLQ12626.1(Caltractin ICL1b [Symbiodinium microadriaticum])	GO:0009058(biological_process:biosynthetic process); GO:0003824(molecular_function:catalytic activity); GO:0016021(cellular_component:integral component of membrane); GO:0005509(molecular_function:calcium ion binding); GO:0004185(molecular_function:serine-type carboxypeptidase activity)	K14992	SLC38A5, SNAT5	map04727(GABAergic synapse)			PF01490(Aa_trans:Transmembrane amino acid transporter protein); PF13520(AA_permease_2:Amino acid permease)
TRINITY_DN19544_c1_g2	2898	2.30911	1.20734	0.000247141	0.263147	yes	up
TRINITY_DN11505_c0_g1	627	2.28916	1.19482	0.0421877	0.998325	yes	up	OLQ12314.1(hypothetical protein AK812_SmicGene3764 [Symbiodinium microadriaticum])
TRINITY_DN7976_c0_g1	817	2.27317	1.18471	0.0068494	0.998325	yes	up
TRINITY_DN12153_c0_g2	731	2.19316	1.13301	0.0205	0.998325	yes	up
TRINITY_DN22117_c0_g3	1940	2.14838	1.10325	0.00652942	0.998325	yes	up	OLP85579.1(Pentatricopeptide repeat-containing protein, chloroplastic [Symbiodinium microadriaticum])							PF13041(PPR_2:PPR repeat family); PF13812(PPR_3:Pentatricopeptide repeat domain)
TRINITY_DN54050_c0_g1	1006	2.14193	1.09891	0.0409501	0.998325	yes	up	OLP85173.1(Ankyrin repeat domain-containing protein 50 [Symbiodinium microadriaticum])	GO:0007131(biological_process:reciprocal meiotic recombination); GO:0046872(molecular_function:metal ion binding); GO:0061630(molecular_function:ubiquitin protein ligase activity); GO:0016021(cellular_component:integral component of membrane); GO:0000795(cellular_component:synaptonemal complex)	K10639	CCNB1IP1, HEI10		ENOG410XTEP(S:Function unknown)	ENOG410XTEP(cyclin B1 interacting protein 1, E3 ubiquitin protein ligase)	PF14634(zf-RING_5:zinc-RING finger domain)
TRINITY_DN17834_c0_g1	406	2.10613	1.0746	0.0290136	0.998325	yes	up
TRINITY_DN14388_c0_g1	234	2.08433	1.05959	0.0318045	0.998325	yes	up	OLP75475.1(hypothetical protein AK812_SmicGene44720 [Symbiodinium microadriaticum])	GO:0015074(biological_process:DNA integration); GO:0016021(cellular_component:integral component of membrane); GO:0004842(molecular_function:ubiquitin-protein transferase activity); GO:0003676(molecular_function:nucleic acid binding)
TRINITY_DN22905_c2_g1	1594	2.07775	1.05502	0.02814	0.998325	yes	up	OLQ04547.1(Pentatricopeptide repeat-containing protein, chloroplastic [Symbiodinium microadriaticum])	GO:0016021(cellular_component:integral component of membrane)						PF13041(PPR_2:PPR repeat family)
TRINITY_DN22254_c0_g1	1231	2.07678	1.05435	0.0449257	0.998325	yes	up	OLP86800.1(hypothetical protein AK812_SmicGene32056 [Symbiodinium microadriaticum])	GO:0016021(cellular_component:integral component of membrane)
TRINITY_DN40827_c0_g1	898	2.07138	1.05059	0.0179567	0.998325	yes	up	OLQ04467.1(hypothetical protein AK812_SmicGene12446 [Symbiodinium microadriaticum])	GO:0016021(cellular_component:integral component of membrane); GO:0046872(molecular_function:metal ion binding); GO:0004190(molecular_function:aspartic-type endopeptidase activity); GO:0016757(molecular_function:transferase activity, transferring glycosyl groups)
TRINITY_DN13599_c0_g1	985	2.05619	1.03997	0.0010708	0.578924	yes	up	OLP81505.1(hypothetical protein AK812_SmicGene37957 [Symbiodinium microadriaticum])	GO:0008168(molecular_function:methyltransferase activity); GO:0022857(molecular_function:transmembrane transporter activity); GO:0032259(biological_process:methylation); GO:0016021(cellular_component:integral component of membrane); GO:0030798(molecular_function:trans-aconitate 2-methyltransferase activity)				ENOG4111RUA(S:Function unknown)	ENOG4111RUA(-)	PF08242(Methyltransf_12:Methyltransferase domain); PF13649(Methyltransf_25:Methyltransferase domain); PF08241(Methyltransf_11:Methyltransferase domain); PF13489(Methyltransf_23:Methyltransferase domain); PF05175(MTS:Methyltransferase small domain)
TRINITY_DN26074_c0_g1	904	2.04687	1.03342	0.0364335	0.998325	yes	up
TRINITY_DN35390_c0_g1	428	2.03607	1.02579	0.0162265	0.998325	yes	up	OLP88637.1(Sperm-associated antigen 6 [Symbiodinium microadriaticum])
TRINITY_DN17962_c0_g1	803	2.02775	1.01988	0.0423121	0.998325	yes	up	OLQ11872.1(E3 ubiquitin-protein ligase HERC2 [Symbiodinium microadriaticum])	GO:0031418(molecular_function:L-ascorbic acid binding); GO:0016705(molecular_function:oxidoreductase activity, acting on paired donors, with incorporation or reduction of molecular oxygen); GO:0020037(molecular_function:heme binding); GO:0008017(molecular_function:microtubule binding); GO:0016021(cellular_component:integral component of membrane); GO:0051537(molecular_function:2 iron, 2 sulfur cl…						PF13540(RCC1_2:Regulator of chromosome condensation (RCC1) repeat)
TRINITY_DN6701_c0_g1	990	2.00692	1.00498	0.0158388	0.998325	yes	up	OLP84360.1(hypothetical protein AK812_SmicGene34784 [Symbiodinium microadriaticum])	GO:0016021(cellular_component:integral component of membrane)
TRINITY_DN41039_c0_g1	1216	2.00153	1.0011	0.0389791	0.998325	yes	up	OLQ06320.1(Ankyrin-1 [Symbiodinium microadriaticum])	GO:0016301(molecular_function:kinase activity); GO:0016021(cellular_component:integral component of membrane); GO:0003677(molecular_function:DNA binding); GO:0004523(molecular_function:RNA-DNA hybrid ribonuclease activity); GO:0015074(biological_process:DNA integration); GO:0015267(molecular_function:channel activity); GO:0004190(molecular_function:aspartic-type endopeptidase activity); GO:000552…						PF12796(Ank_2:Ankyrin repeats (3 copies)); PF13637(Ank_4:Ankyrin repeats (many copies)); PF13606(Ank_3:Ankyrin repeat); PF00023(Ank:Ankyrin repeat); PF13857(Ank_5:Ankyrin repeats (many copies))
